# Supplementary material
Source: publisher figshare collection journal article supplement (https://acs.figshare.com/ndownloader/files/5786787)

## Supporting Information

*Revised version, MS# JO 026310C*

### **Design and synthesis of novel fluoropeptidomimetics as potential mimics of the transition state during peptide hydrolysis**

*Subhash C. Annedi<sup>a</sup>, Weiyong Li, Sheeba Samson<sup>a</sup> and Lakshmi P. Kotra<sup>a,b,\*</sup>*

<sup>a</sup>Faculty of Pharmacy, Molecular Design and Information Technology Center and <sup>b</sup>Department of Chemistry, University of Toronto, 19 Russell Street, Toronto, ON, M5S 2S2, Canada.

---

\*Corresponding author: Tel. (416) 978-2882, Fax. (416) 978-8511,

E-mail: [p.kotra@utoronto.ca](mailto:p.kotra@utoronto.ca)

## Experimental Section.

Procedure to synthesize compounds **15-20** is described below.

***N*-Benzyl-2-bromo-2,2-difluoro-acetamide (15):** A solution of  $\text{BnNH}_2$  (0.05 g, 0.46 mmol) in anhydrous DMF (1.0 mL) was treated with ethyl bromodifluoroacetate (0.059 mL, 0.46 mmol) at 0 °C. The reaction mixture was stirred for 15 min. and was purified as described for **2** to obtain compound **15** as a syrup (0.1 g, 82%):  $^1\text{H}$  NMR (300 MHz,  $\text{CDCl}_3$ )  $\delta$  4.52 (d, 1H,  $J = 6.0$  Hz), 6.48 (brs, 1H), 7.26-7.39 (m, 5H); MS-EI  $m/z$  265 (5), 263 (5), 184 (100), 141 (28), 91 (64).

***N*-Benzyl-2-bromo-2,2-difluoro-*N*-methyl acetamide (16):** A solution of *N*-benzylmethyl amine (0.05 g, 0.41 mmol) in anhydrous DMF (1.0 mL) was treated with DMAP (0.05 g, 0.41 mmol) and ethyl bromodifluoroacetate (0.052 mL, 0.41 mmol) at 0 °C and stirred for another 1 h at rt. The reaction mixture was extracted into ethyl acetate and was purified as described for **2** to obtain compound **16** as a syrup (0.021 g, 19%):  $^1\text{H}$  NMR (200 MHz,  $\text{CDCl}_3$ )  $\delta$  3.10 (s, 3H), 4.65 (s, 2H), 7.20-7.46 (m, 5H).

**Benzoic acid 2-bromo-2-fluoro-ethyl ester (17):** A solution of ethyl bromofluoroacetate (0.1 g, 0.54 mmol) in anhydrous MeOH (1.0 mL) was treated with  $\text{NaBH}_4$  (5 mg, 0.13 mmol) at 0 °C. The reaction mixture was stirred for another 2 h at rt and treated with water. The reaction mixture was extracted into ether, and the organic layer was washed with brine and dried ( $\text{Na}_2\text{SO}_4$ ). Organic layer was concentrated to a volume of 5 mL, and  $\text{Et}_3\text{N}$  (0.075 mL, 0.54 mmol) and  $\text{BzCl}$  (0.062 mL, 0.54 mmol) were added at 0 °C. The reaction mixture was stirred for another 30 min at 0 °C. The reaction mixture was dissolved in ethyl acetate, washed with sat  $\text{NaHCO}_3$  solution, water, brine and dried ( $\text{Na}_2\text{SO}_4$ ). The concentrated organic layer was purified by column chromatography (EtOAc:Hex, 3:97) to obtain compound **17** as an oil (0.12 g, 91%):

$^1\text{H}$  NMR (300 MHz,  $\text{CDCl}_3$ )  $\delta$  4.69-4.83 (m, 2H), 6.65 (ddd, 1H,  $J = 3.3, 6.6, 51.1$  Hz), 7.44-7.62 (m, 3H), 8.05-8.09 (m, 2H);  $^{13}\text{C}$  NMR (75 MHz,  $\text{CDCl}_3$ )  $\delta$  67.08 (d,  $J = 22.5$  Hz), 89.46 (d,  $J = 253.5$  Hz), 128.55, 128.96, 129.90, 133.62, 165.53; MS-EI  $m/z$  248 (6), 246 (6), 122 (75), 105 (100), 77 (51).

**2-(2-Bromo-2-fluoro-ethoxy)-tetrahydro-pyran (18):** A solution of ethyl bromofluoroacetate (0.1 g, 0.54 mmol) in anhydrous MeOH (1.0 mL) was treated with  $\text{NaBH}_4$  (0.005 g, 0.13 mmol) at 0 °C. The reaction mixture was stirred for another 2 h at rt, and worked-up as described for **17**. The resulting organic layer was further treated with catalytic PTSA and DHP (0.04 mL, 0.54 mmol) at 0 °C. The reaction mixture was stirred for 1 h at rt and was purified as described for **17** to obtain compound **18** as an oil (0.044 g, 36%):  $^1\text{H}$  NMR (300 MHz,  $\text{CDCl}_3$ )  $\delta$  1.51-1.85 (m, 6H), 3.51-3.58 (m, 1H), 3.81-4.20 (m, 3H), 4.72 (s, 1H), 6.52 (ddd, 1H,  $J = 51.4$  Hz); MS-EI  $m/z$  228 (14), 226 (14), 127 (23), 125 (23), 85 (100), 56 (88).

**Benzoic acid 2-azido-2-fluoro-ethyl ester (19):** A solution of compound **17** (0.02 g, 0.08 mmol) in anhydrous DMSO (1.0 mL) was treated with  $\text{NaN}_3$  (0.026 g, 0.40 mmol) and stirred for 18 h at 50 °C. The reaction mixture was brought to rt, treated with water and extracted into ethyl acetate. The organic layer was washed with brine and dried ( $\text{Na}_2\text{SO}_4$ ). The concentrated organic layer was purified by column chromatography (EtOAc:Hex, 2:98) to obtain compound **19** as a syrup (0.016 g, qua):  $^1\text{H}$  NMR (300 MHz,  $\text{CDCl}_3$ )  $\delta$  4.36-4.53 (m, 2H), 5.82 (dt, 1H,  $J = 4.8, 55.8$  Hz), 7.44-7.49 (m, 2H), 7.57-7.62 (m, 1H), 8.05-8.08 (m, 2H); MS-EI  $m/z$  209 (7), 167 (42), 161 (19), 122 (100).

**2-(2-Azido-2-fluoro-ethoxy)-tetrahydro-pyran (20):** A solution of compound **18** (0.4 g, 1.75 mmol) in anhydrous DMSO (2.0 mL) was treated with  $\text{NaN}_3$  (0.45 g, 7.01 mmol) and stirred for 18 h at 50 °C. The reaction mixture was purified as described for **19** to obtain compound **20** as a

syrup (0.198 g, 60%):  $^1\text{H}$  NMR (300 MHz,  $\text{CDCl}_3$ )  $\delta$  1.51-1.84 (m, 6H), 3.50-3.69 (m, 2H), 3.75-3.92 (m, 2H), 4.67 (brs, 1H), 5.44-5.50, 5.62-5.69 (2m, 1H).

98-200-7

Pulse Sequence: s2pul

Solvent: CDCl<sub>3</sub>

Temp. 25.0 C / 298.1 K

Mercury-300 "mercury300"

PULSE SEQUENCE

Pulse 45.0 degrees

Acq. time 2.279 sec

Width 2645.5 Hz

16 repetitions

OBSERVE H1, 300.0554553 MHz

DATA PROCESSING

Line broadening 0.2 Hz

FT size 65536

Total time 0 min, 40 sec

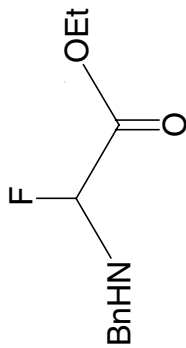

Compound 2

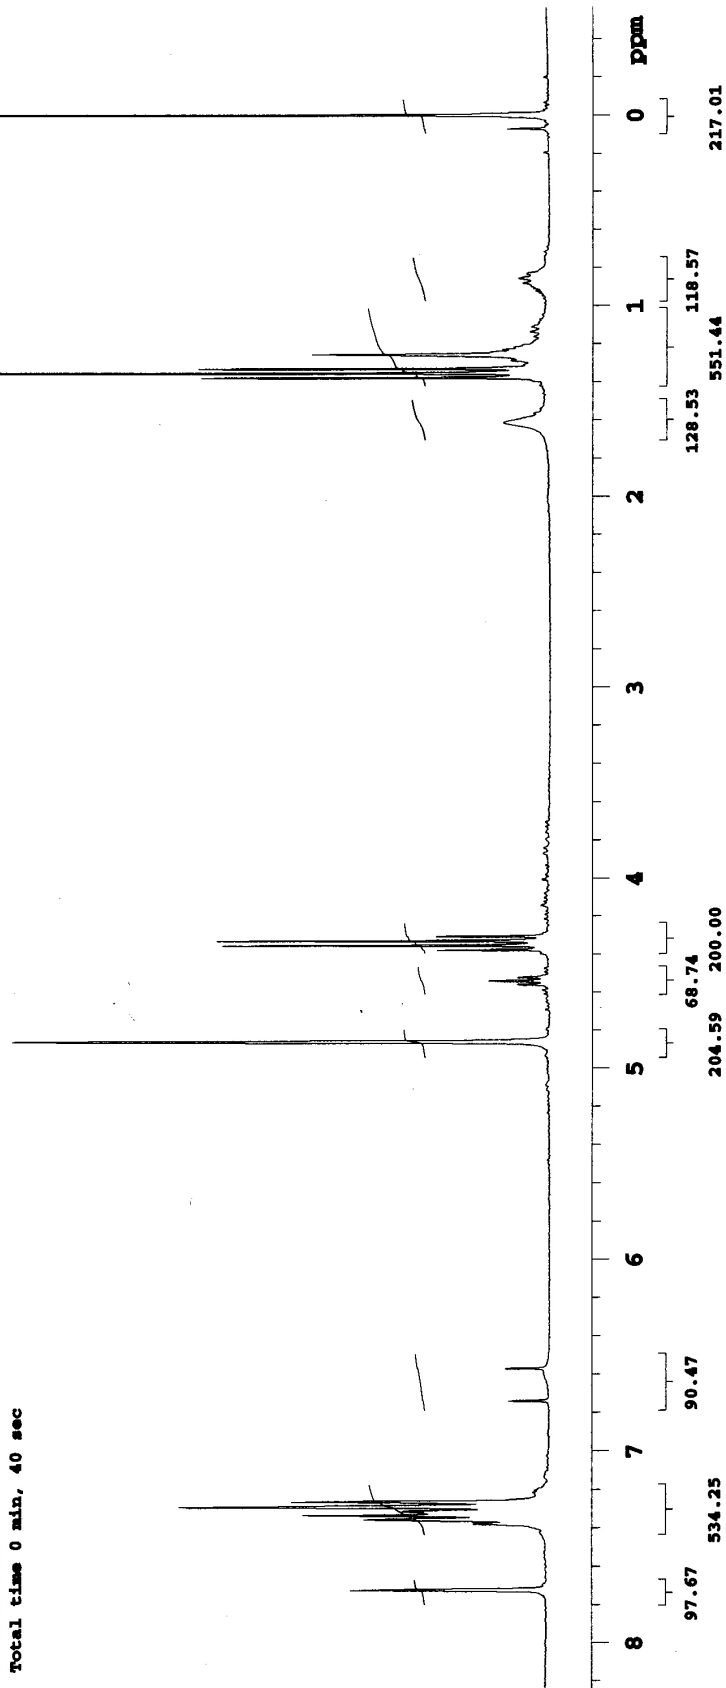

7

SCA-IV-29-1-D2O

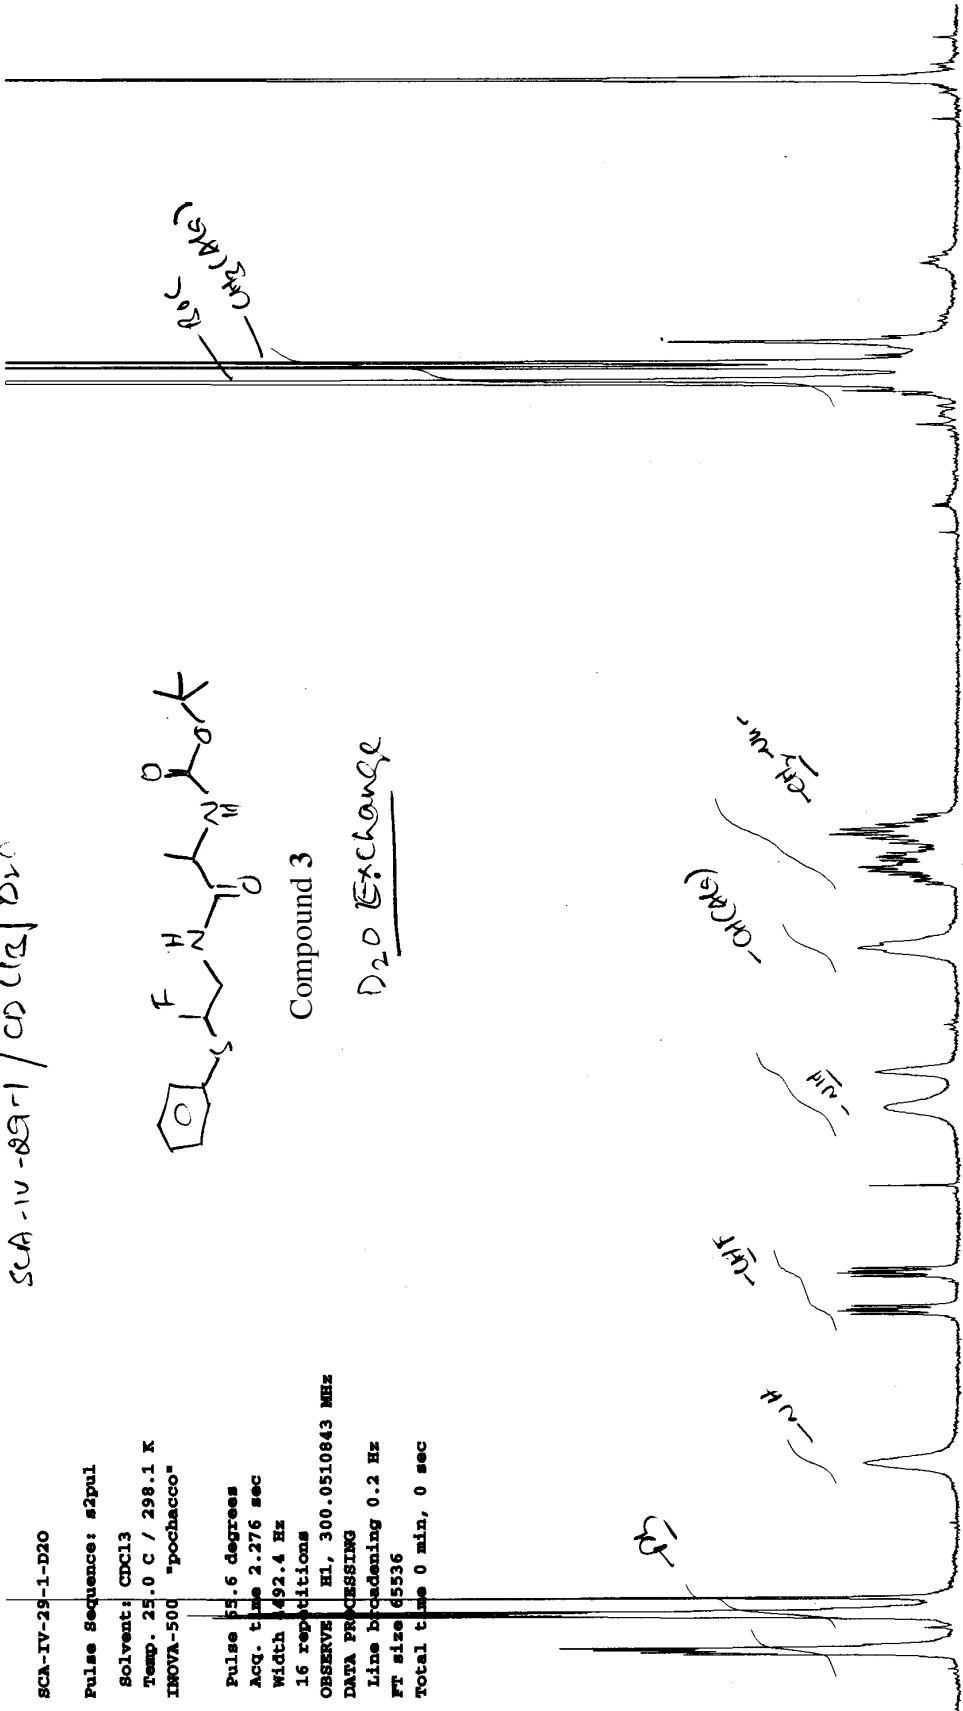

SCA-IV-29-1-D2O

Pulse Sequence: s2pul

Solvent: CDCl<sub>3</sub>

Temp. 25.0 C / 298.1 K

INOVA-500 "pochacco"

Pulse 55.6 degrees

Acq. time 2.276 sec

Width 492.4 Hz

16 repetitions

OBSERVE H1, 300.0510843 MHz

DATA PROCESSING

Line broadening 0.2 Hz

FT size 65536

Total time 0 min, 0 sec

Compound 3

D<sub>2</sub>O Exchange

| ppm   | 1 | 2 | 3 | 4 | 5 | 6 | 7 |
|-------|---|---|---|---|---|---|---|
| 13.68 |   |   |   |   |   |   |   |
| 24.06 |   |   |   |   |   |   |   |
| 7.82  |   |   |   |   |   |   |   |
| 10.00 |   |   |   |   |   |   |   |
| 12.74 |   |   |   |   |   |   |   |
| 19.32 |   |   |   |   |   |   |   |
| 90.17 |   |   |   |   |   |   |   |



SCA-NV-93-1 / 141 CDUg | 05.07.02

SCA-IV-93-1  
Pulse Sequence: s2pul  
Solvent: CDCl<sub>3</sub>  
Temp. 25.0 C / 298.1 K  
Mercury-300 Mercury300-  
Pulse 69.1 degrees  
Acq. time 2.276 sec  
Width 4492.4 Hz  
16 repetitions  
OBSERVE H1, 300.0510775 MHz  
DATA PROCESSING  
Line broadening 0.2 Hz  
Ft size 65536  
Total time 0 min, 42 sec

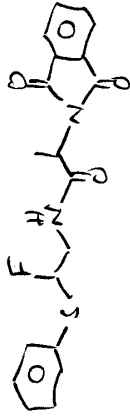

Compound 5

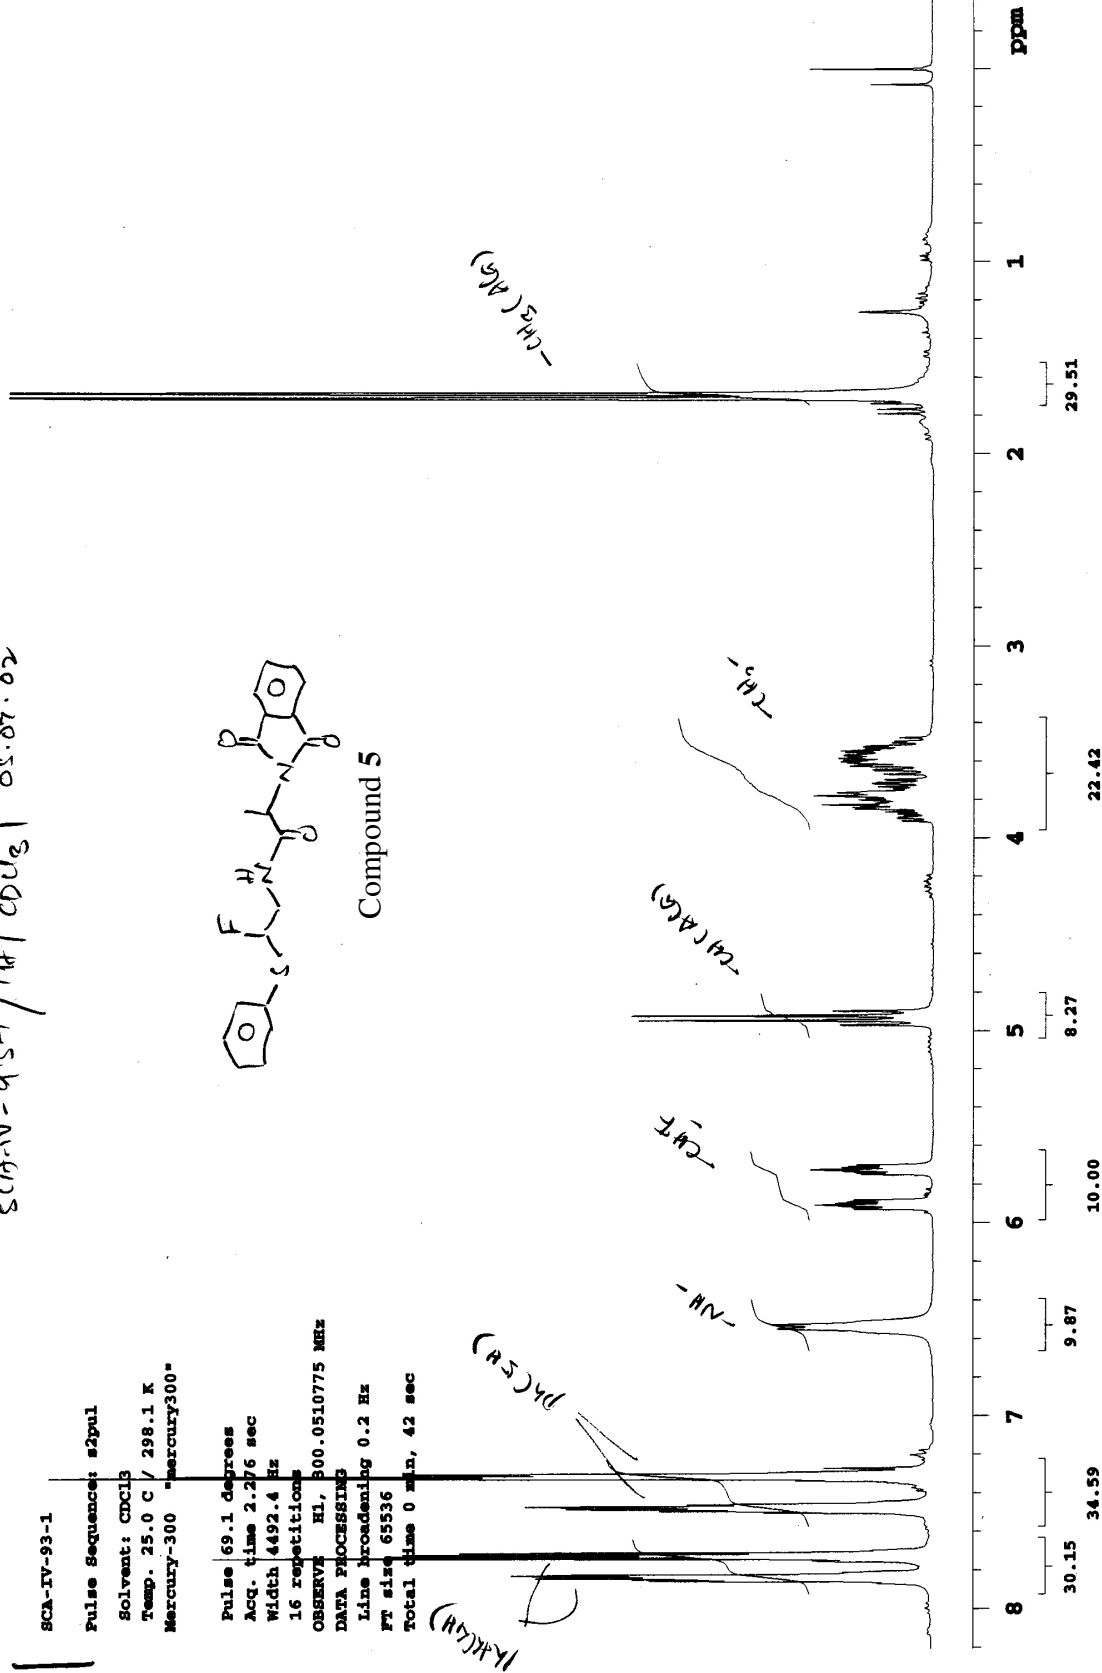

SCA-IV-95-1

Pulse Sequence: s2pul

Solvent: CDCl<sub>3</sub>

Temp. 25.0 C / 298.1 K

Mercury-300 "mercury300"

Pulse 69.1 degrees  
Acq. time 2.276 sec  
Width 4492.4 Hz  
16 repetitions  
OBSERVE H1, 300.0510768 MHz  
DATA PROCESSING  
Line broadening 0.2 Hz  
FT size 65536  
Total time 6 min, 0 sec

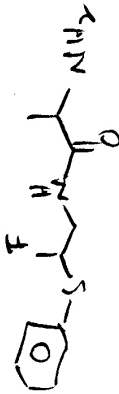

Compound 6

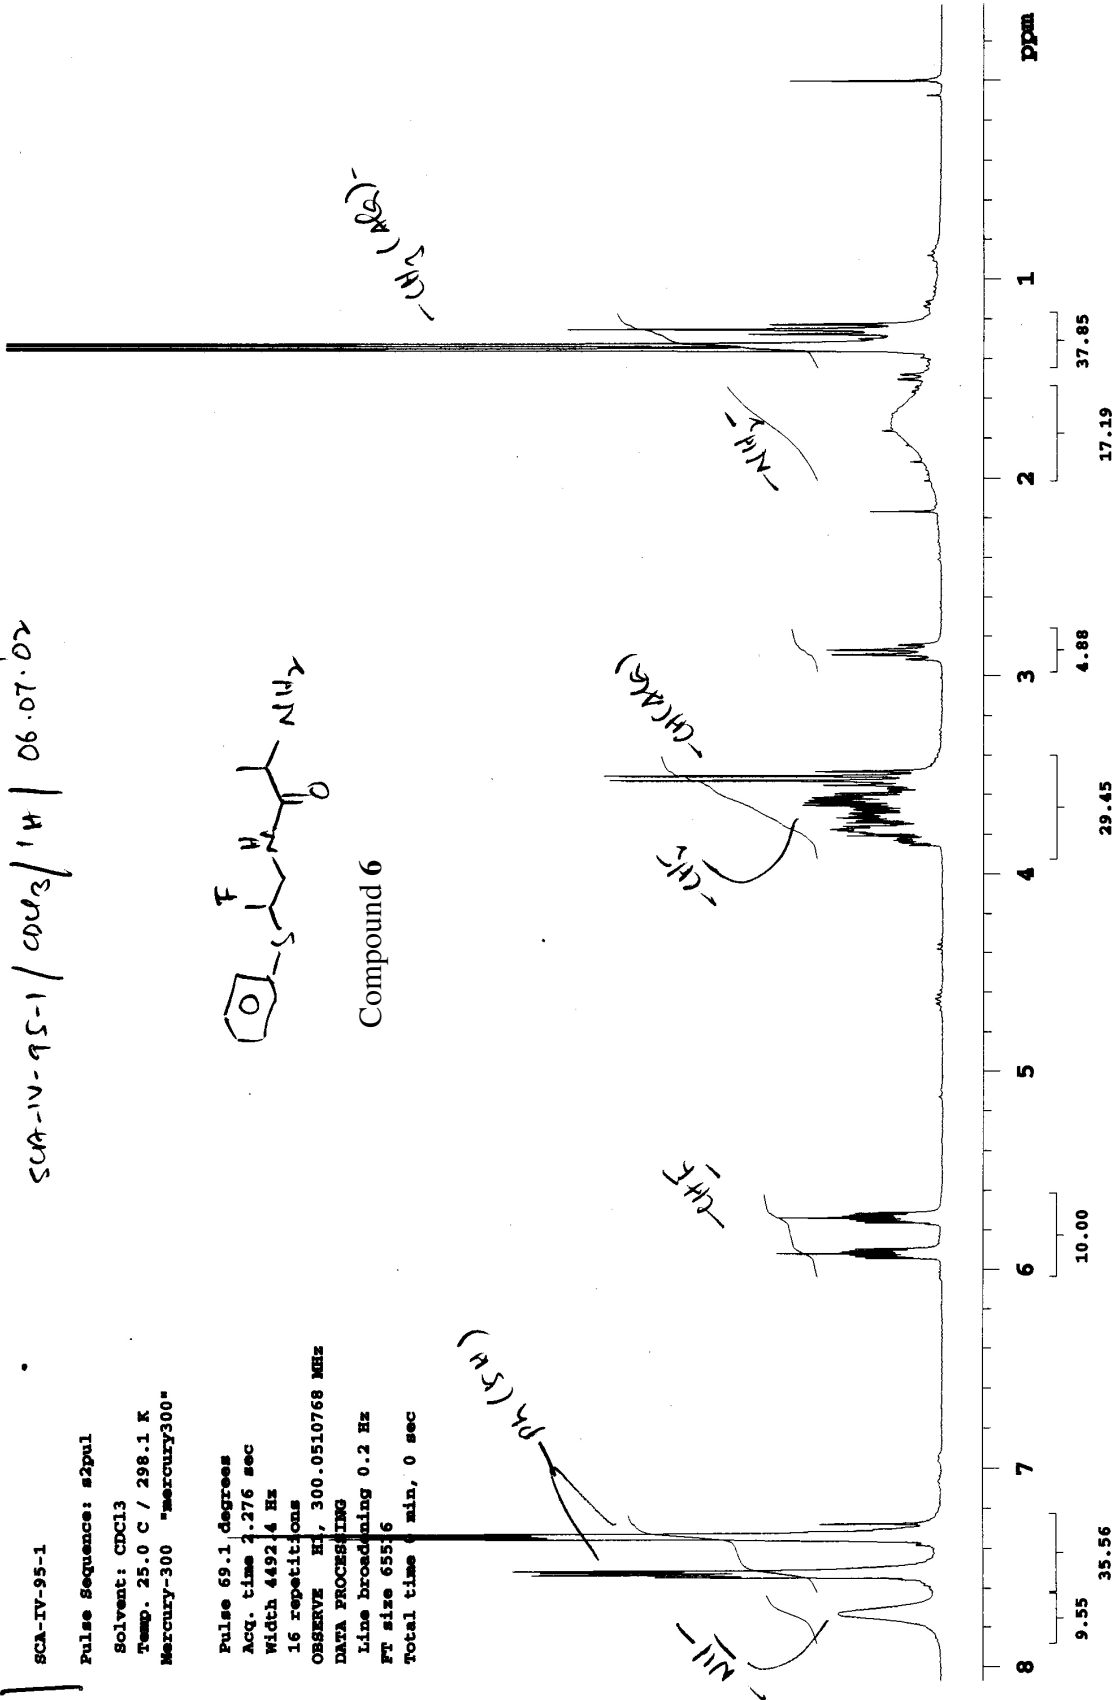

SCA-IV-62-1

Pulse Sequence: s2pul

Solvent: CDCl3

Temp. 25.0 C / 298.1 K

File: SCA-IV-62-1

INOVA-500 "pochacco"

Pulse 69.1 degrees

Acq. time 2.276 sec

Width 4492.4 Hz

16 repetitions

OBSERVE H1, 300.0510809 MHz

DATA PROCESSING

Line broadening 0.2 Hz

FT size 65536

Total time 0 min, 42 sec

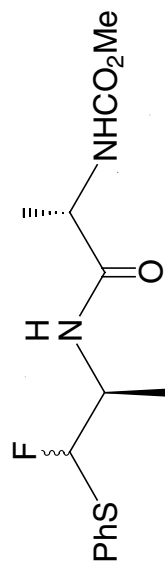

Compound 7

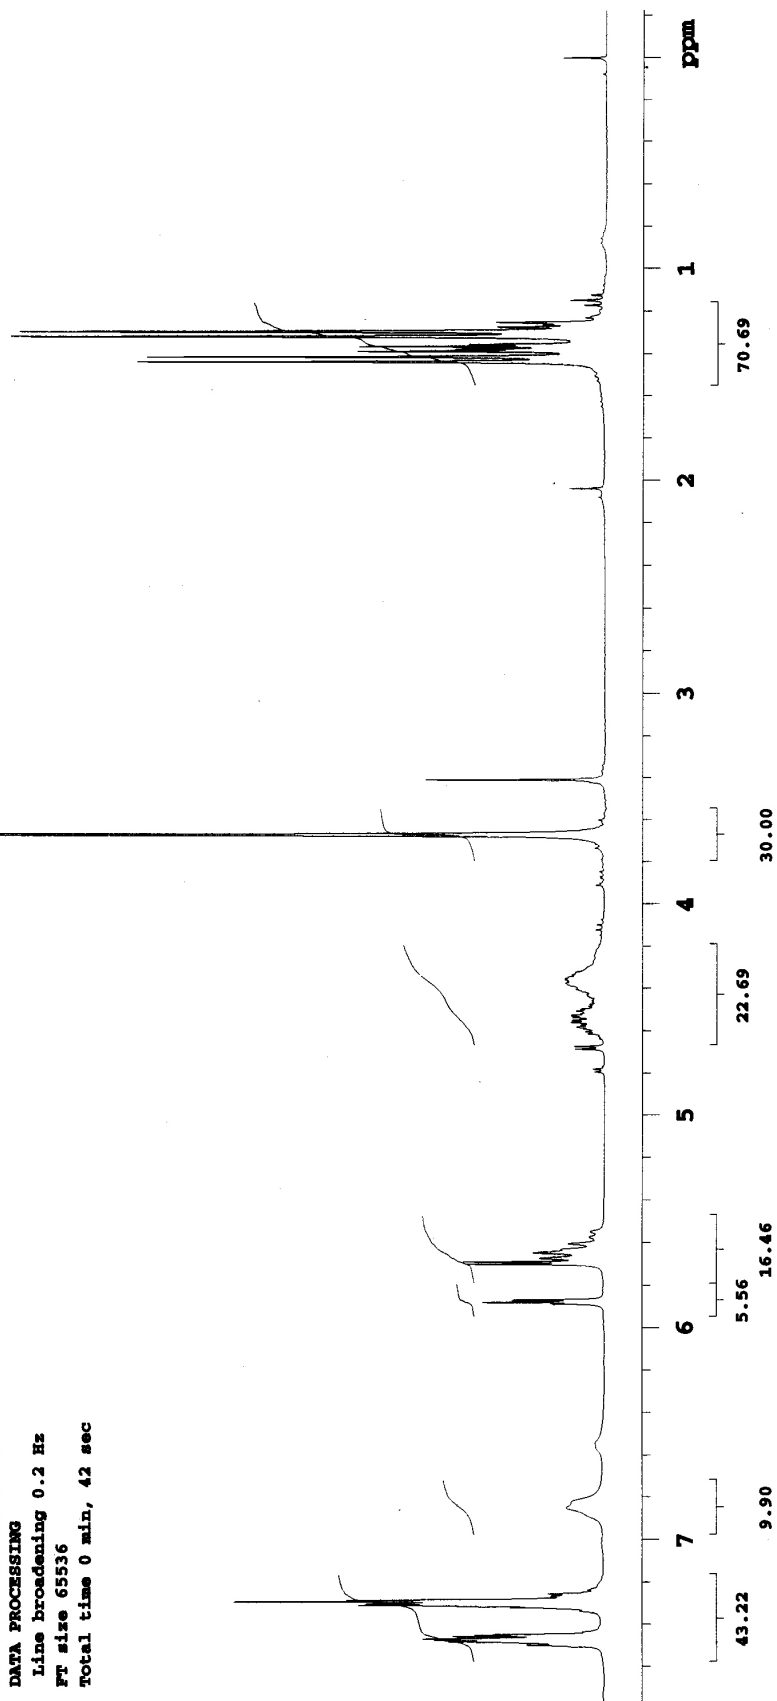

SCA-IV-50-1f

Pulse Sequence: s2pul

Solvent: CDCl3

Temp. 25.0 C / 298.1 K

File: SCA-IV-50-1f

INOVA-500 "pochacco"

Pulse 69.1 degrees

Acq. time 2.276 sec

Width 4497.4 Hz

16 repetitions

OBSERVE M1, 300.0510856 MHz

DATA PROCESSING

Line broadening 0.2 Hz

FT size 65536

Total time 0 min, 42 sec

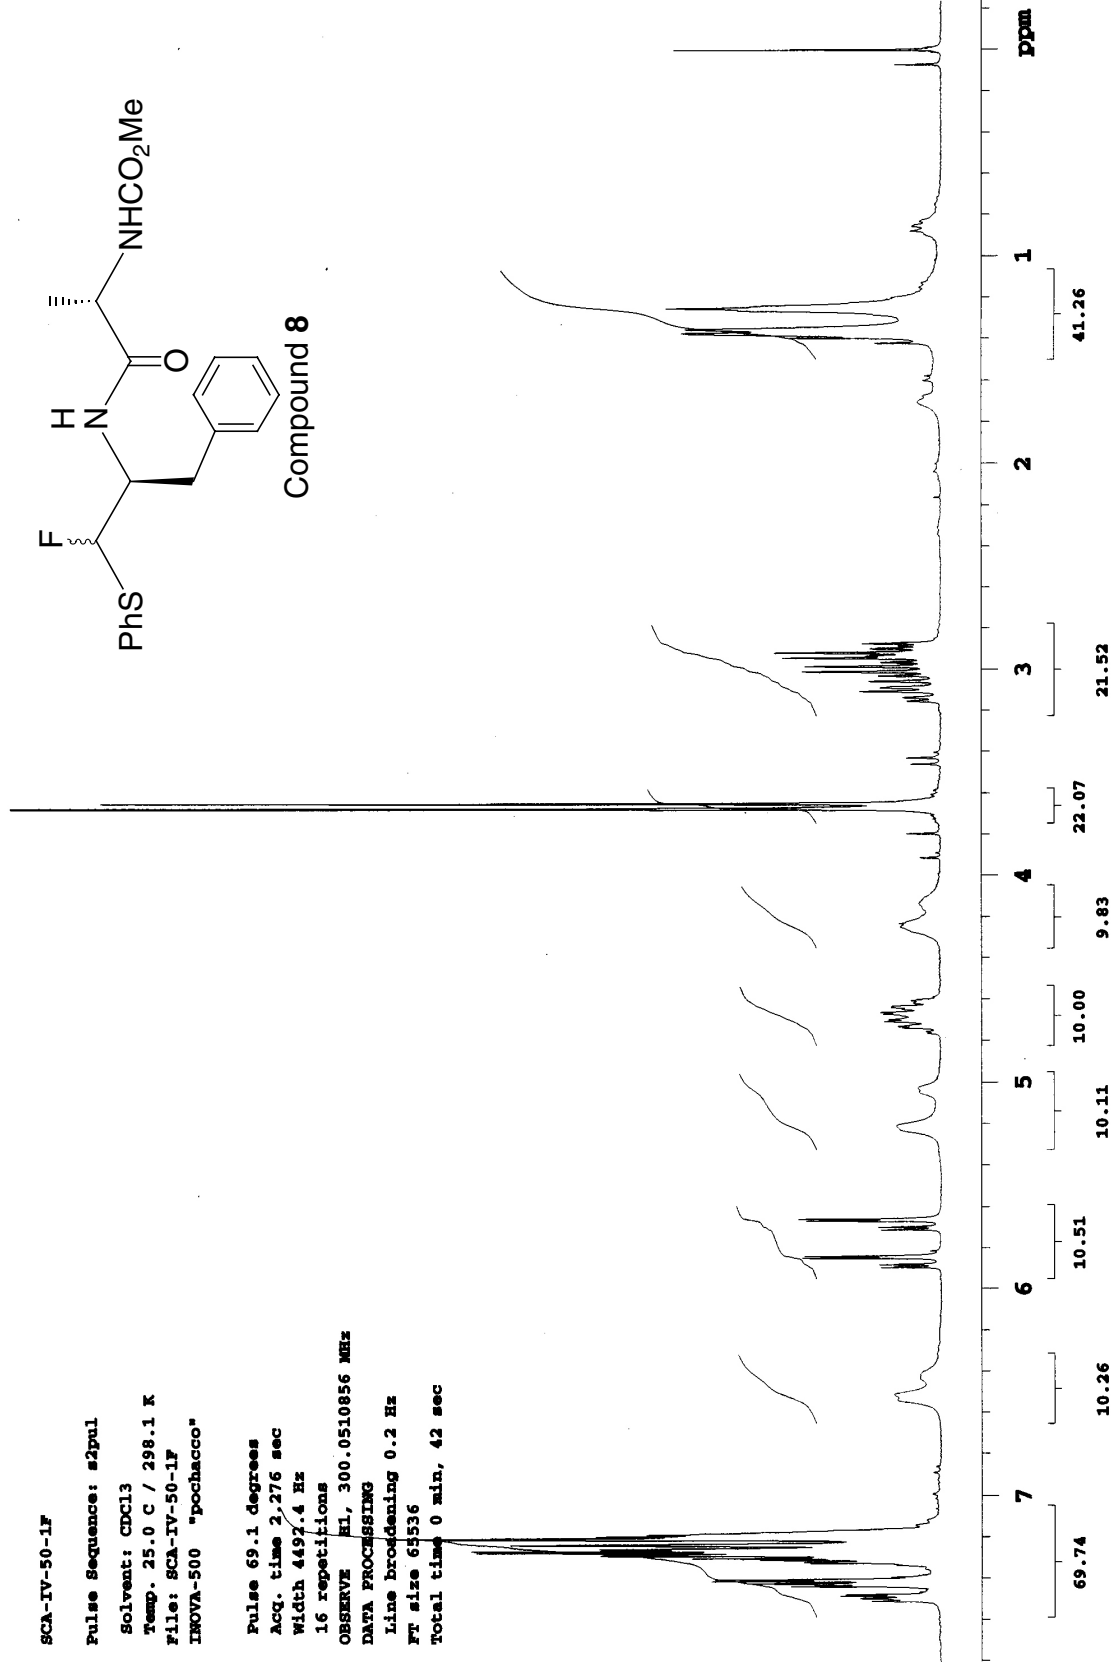

SCA-IV-61-1

Pulse Sequence: s2pul

Solvent: CDCl3

Temp. 25.0 C / 298.1 K

File: SCA-IV-61-1

INOVA-500 "pochacco"

Pulse 69.1 degrees

Acq. time 2.276 sec

Width 4492.4 Hz

16 repetitions

OBSERVE H1, 300.0510813 MHz

DATA PROCESSING

Line broadening 0.2 Hz

FT size 65536

Total time 0 min, 42 sec

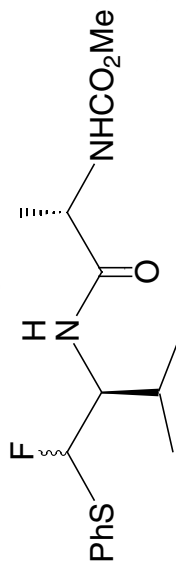

Compound 9

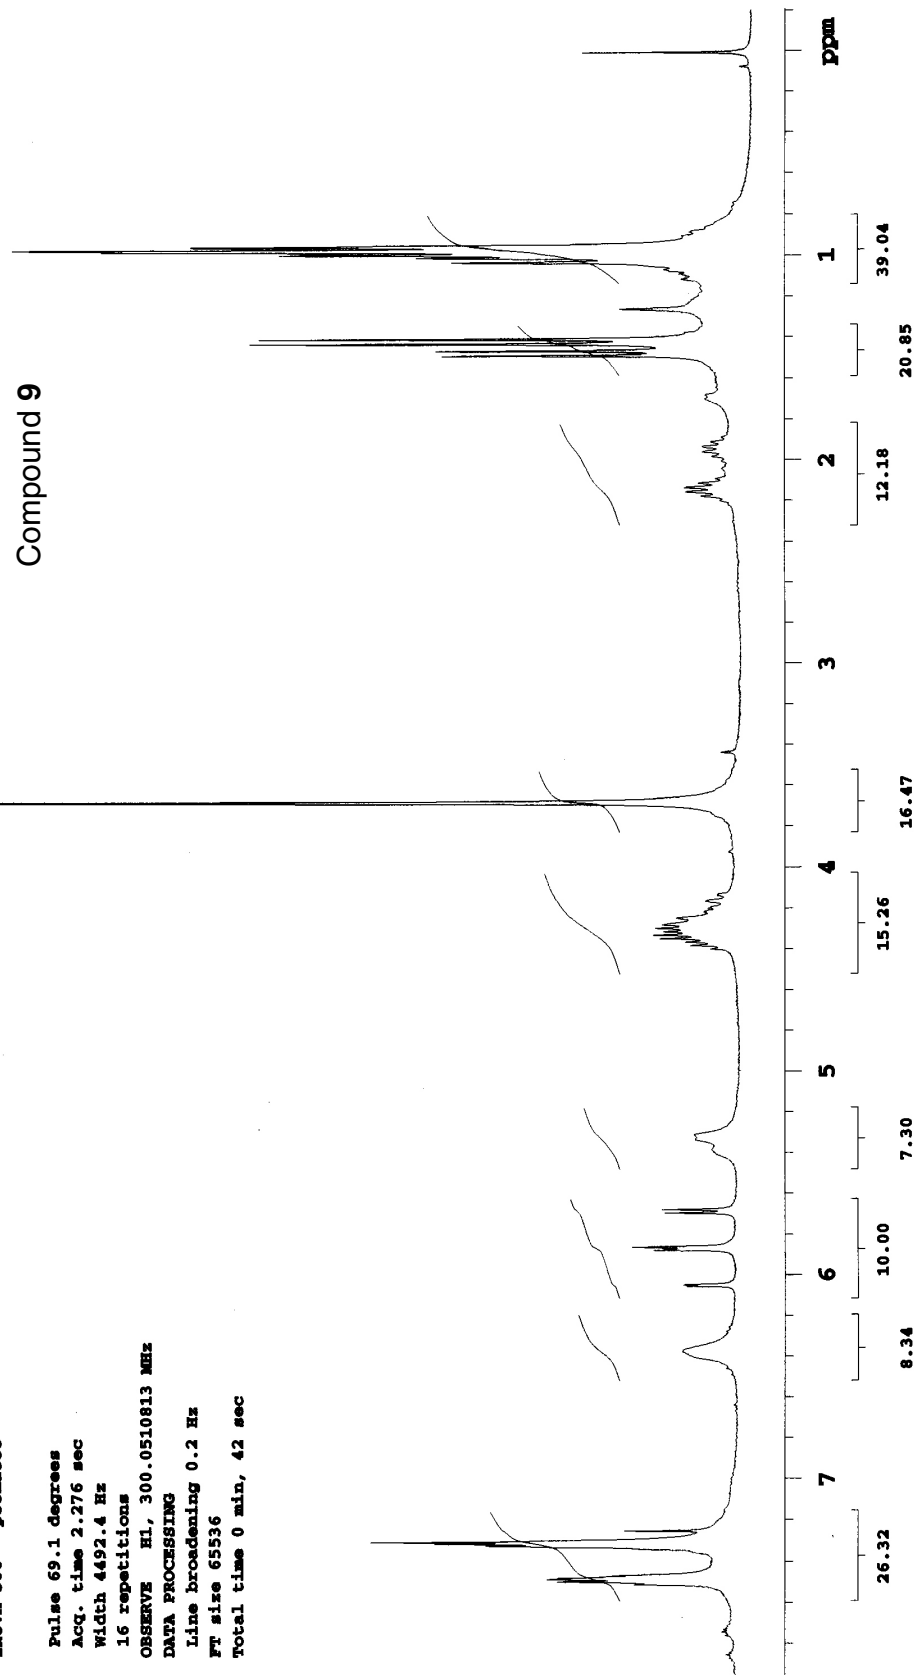

Supplement: Supplementary file 1 [file 5786787]
